# Supplementary material for: Evolution of Anesthetic Techniques for Shoulder Surgery: A Narrative Review
Source: MDPI journal article supplement (doi:10.3390/osteology2010006), 2022-03-06
Supplement: s1 [file s1]

Review

# Evolution of Anesthetic Techniques for Shoulder Surgery: A Narrative Review

Francesca Gargano, Sabrina Migliorelli, Alessandro Strumia \*, Massimiliano Carassiti, and Felice Eugenio Agrò

Unit of Anesthesia, Intensive Care and Pain Management, Department of Medicine, Università Campus Bio-Medico di Roma, Via Álvaro del Portillo 21, 00128 Rome, Italy; f.gargano@policlinicocampus.it (F.G.); sabrina.migliorelli@unicampus.it (S.M.); m.carassiti@policlinicocampus.it (M.C.); f.agro@policlinicocampus.it (F.E.A.)

\* Correspondence: a.strumia@unicampus.it; Tel.: +39-3471403574

**Citation:** Gargano, F.; Migliorelli, S.; Strumia, A.; Carassiti, M.; Agrò, F.E. Evolution of Anesthetic Techniques for Shoulder Surgery: A Narrative Review. *Osteology* **2022**, *2*, 52–61. <https://doi.org/10.3390/osteology2010006>

Academic Editor(s): Georg Osterhoff

Received: 10 November 2021

Accepted: 2 March 2022

Published: 6 March 2022

**Publisher's Note:** MDPI stays neutral with regard to jurisdictional claims in published maps and institutional affiliations.

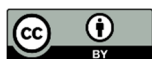

**Copyright:** © 2022 by the authors. Licensee MDPI, Basel, Switzerland. This article is an open access article distributed under the terms and conditions of the Creative Commons Attribution (CC BY) license (<https://creativecommons.org/licenses/by/4.0/>).

**Table S1.** summary of the principal studies regarding anesthetic techniques for shoulder surgery.

| Authors,<br>year           | Title                                                                                                                                                                    | Study design                                                 | Outcomes/ Outcomes<br>measures                                                                                                                                                               | Summary of findings                                                                                                                                                                                                                                                                                                                                        |
|----------------------------|--------------------------------------------------------------------------------------------------------------------------------------------------------------------------|--------------------------------------------------------------|----------------------------------------------------------------------------------------------------------------------------------------------------------------------------------------------|------------------------------------------------------------------------------------------------------------------------------------------------------------------------------------------------------------------------------------------------------------------------------------------------------------------------------------------------------------|
| A. Ghaleb et al.<br>2012   | Anesthesia for<br>Shoulder Surgery: A<br>Review of the<br>Interscalene Block<br>and<br>a Discussion of<br>Regional vs. General<br>Anesthesia                             | Review                                                       | Review the performance<br>of the interscalene block<br>and discuss alternative<br>choices for shoulder<br>surgery, general<br>anesthesia and a<br>combined<br>general/regional<br>technique. | /                                                                                                                                                                                                                                                                                                                                                          |
| Sripada et al.,<br>2012    | Regional anesthesia<br>procedures for<br>shoulder and upper<br>arm surgery upper<br>extremity update-<br>2005 to present                                                 | Review                                                       | Review of the literature<br>since 2005 on<br>developments of RA<br>techniques commonly<br>used for shoulder<br>surgery.                                                                      | The ISB provides<br>effective analgesia with<br>minimal<br>complications; when<br>combined with GA, ISB<br>can be used in lower<br>volumes and reducing<br>the complications for<br>shoulder and proximal<br>upper<br>extremity.<br>USG ISB and SCB are<br>both effective and safe<br>for shoulder<br>surgery with a low<br>incidence of<br>complications. |
| D.Y. Ding et al.,<br>2017  | Comparison of<br>general versus<br>isolated regional<br>anaesthesia in total<br>shoulder<br>arthroplasty: A<br>retrospective<br>propensity-matched<br>cohort<br>analysis | A retrospective<br>propensity-matched<br>cohort analysis     | In-hospital<br>complications and<br>90-day readmission<br>rates.                                                                                                                             | After total shoulder<br>arthroplasty, isolated<br>RA is associated with<br>lower in-hospital<br>complications,<br>readmission rates<br>and odds of hospital<br>readmission than GA.                                                                                                                                                                        |
| P.S. Sebel et al.,<br>2004 | The Incidence of<br>Awareness During<br>Anaesthesia:<br>A Multicenter<br>United States Study                                                                             | Prospective,<br>nonrandomized<br>descriptive cohort<br>study | BIS values associated<br>with intraoperative<br>awareness events.                                                                                                                            | The incidence of<br>awareness with recall<br>after general anesthesia<br>(0.13%) in the US is<br>comparable to that<br>described in other<br>countries. Assuming<br>that approximately 20<br>million anesthetics are<br>administered in the<br>United States annually,<br>approximately 26,000                                                             |

|                                    |                                                                                                                                                                                    |                                               | cases to occur each year.                                                                                                                                                                                                                                                                                                                                                                                                                                                             |                                                                                                                                                                                                                                                                                                                                                                             |
|------------------------------------|------------------------------------------------------------------------------------------------------------------------------------------------------------------------------------|-----------------------------------------------|---------------------------------------------------------------------------------------------------------------------------------------------------------------------------------------------------------------------------------------------------------------------------------------------------------------------------------------------------------------------------------------------------------------------------------------------------------------------------------------|-----------------------------------------------------------------------------------------------------------------------------------------------------------------------------------------------------------------------------------------------------------------------------------------------------------------------------------------------------------------------------|
| <b>A.R. Brown, 1993</b>            | Interscalene block for shoulder arthroscopy: comparison with general anesthesia                                                                                                    | Comparative-study                             | <p>The aim was to demonstrate that regional anesthesia has several benefits over general anesthesia for arthroscopic surgery, particularly in the ambulatory patient. The parameters taken into consideration: time from the start of administration of anesthetic until the incision was made; duration of surgery; postoperative side effects, including postoperative pain, nausea and vomiting, inability to void; number of patients requiring overnight hospital admission.</p> | Interscalene brachial plexus block for shoulder arthroscopy is safe and effective, with a high degree of patient acceptance and satisfaction. Compared with general anesthesia, it results in significantly fewer complications and a shorter hospital stay, making this form of anesthesia ideal for outpatient surgery.                                                   |
| <b>J.G. D'Alessio et al., 1995</b> | A retrospective comparison of interscalene block and general anesthesia for ambulatory surgery shoulder arthroscopy                                                                | Retrospective comparative study               | <p>Total nonsurgical intraoperative time; use post-anesthesia care unit stay; unplanned admissions for therapy of severe pain, sedation, or nausea/vomiting.</p>                                                                                                                                                                                                                                                                                                                      | Interscalene block should be considered as a viable alternative to general anesthesia for shoulder arthroscopy in ambulatory surgery patients.                                                                                                                                                                                                                              |
| <b>C. Sun et al., 2021</b>         | Suprascapular nerve block is a clinically attractive alternative to interscalene nerve block during arthroscopic shoulder surgery: a meta-analysis of randomized controlled trials | Meta-analysis of randomized controlled trials | <p>Comparison the impact of SSNB and ISB during shoulder arthroscopy surgery. Outcomes measures: VAS at rest VAS with movement Duration of PACU stay Patient satisfaction Opioid drugs consumption Nerve block-related complications</p>                                                                                                                                                                                                                                              | SSNB as an effective and safe analgesic technique and a clinically attractive alternative to interscalene block with the SSNB'S advantage of similar pain control, morphine use, and less nerve block-related complications during arthroscopic shoulder surgery, especially for severe chronic obstructive pulmonary disease, obstructive sleep apnea, and morbid obesity. |

|                            |                                                                                                                                                                                                                                      |                                                   |                                                                                                                                                                                                                                                                                                                                                                                                                                                                                                                                                                                                                                                 |                                                                                                                                                                                                                                                                                                                                       |
|----------------------------|--------------------------------------------------------------------------------------------------------------------------------------------------------------------------------------------------------------------------------------|---------------------------------------------------|-------------------------------------------------------------------------------------------------------------------------------------------------------------------------------------------------------------------------------------------------------------------------------------------------------------------------------------------------------------------------------------------------------------------------------------------------------------------------------------------------------------------------------------------------------------------------------------------------------------------------------------------------|---------------------------------------------------------------------------------------------------------------------------------------------------------------------------------------------------------------------------------------------------------------------------------------------------------------------------------------|
| S.S Liu et al.,<br>2009    | A Prospective,<br>Randomized,<br>Controlled Trial<br>Comparing<br>Ultrasound Versus<br>Nerve Stimulator<br>Guidance for<br>Interscalene Block<br>for Ambulatory<br>Shoulder Surgery for<br>Postoperative<br>Neurological<br>Symptoms | A Prospective,<br>Randomized,<br>Controlled Trial | This trial in order to<br>determine whether<br>ultrasound could reduce<br>the incidence of<br>postoperative<br>neurological symptoms<br>compared to nerve<br>stimulator-guided<br>interscalene blocks, for<br>shoulder<br>arthroscopy<br>A standardized<br>neurological assessment<br>tool (questionnaire and<br>physical examination)<br>designed by a<br>neurologist was<br>administered<br>before surgery, at<br>approximately 1 week<br>after surgery and at<br>approximately 4–6<br>weeks after surgery.<br>Diagnosis of<br>postoperative<br>neurological symptoms<br>was determined by a<br>neurologist<br>blinded to block<br>technique. | Ultrasound reduces the<br>number of needle passes<br>needed to perform<br>interscalene block and<br>enhanced motor block at<br>the 5 min assessment;<br>however,<br>not significant<br>differences observed in<br>block failures, patient<br>satisfaction or<br>incidence, and severity<br>of postoperative<br>neurological symptoms. |
| J.A. Lim et al.,<br>2020   | Comparison of<br>ultrasound-guided<br>and nerve<br>stimulator-guided<br>interscalene blocks<br>as a sole anesthesia<br>in shoulder<br>arthroscopic rotator<br>cuff repair                                                            | Retrospective study                               | To determine whether<br>US-ISB reduces block<br>failure rate and<br>improves the quality of<br>ISB relative to NS-ISB<br>through comparison of<br>the conversion ratio to<br>general anesthesia and<br>intraoperative use of<br>analgesics and sedatives<br>in arthroscopic rotator<br>cuff tear surgery.                                                                                                                                                                                                                                                                                                                                       | US-ISB is a more<br>effective and safer<br>approach for providing<br>intense block to NS-ISB<br>because it can decrease<br>the incidence of<br>conversion to general<br>anesthesia and reduce<br>the use of analgesics<br>and sedatives during<br>arthroscopic shoulder<br>surgery.                                                   |
| N. Hussain et al.,<br>2017 | Suprascapular and<br>Interscalene Nerve<br>Block for<br>Shoulder Surgery                                                                                                                                                             | Systematic Review and<br>Meta-analysis            | Comparison of the<br>analgesic effect and<br>safety of suprascapular<br>block <i>versus</i> interscalene<br>block for shoulder<br>surgery through<br>postoperative 24-h<br>cumulative oral<br>morphine consumption                                                                                                                                                                                                                                                                                                                                                                                                                              | There are no clinically<br>meaningful analgesic<br>differences between<br>suprascapular block<br>and interscalene block<br>except for interscalene<br>block providing better<br>pain control during<br>recovery room stay;                                                                                                            |

|                                   |                                                                                                                                                                 |                                     |                                                                                                                                                                                                                                                                                                                                                                 |                                                                                                                                                                                                                                                                                                                                                                  |
|-----------------------------------|-----------------------------------------------------------------------------------------------------------------------------------------------------------------|-------------------------------------|-----------------------------------------------------------------------------------------------------------------------------------------------------------------------------------------------------------------------------------------------------------------------------------------------------------------------------------------------------------------|------------------------------------------------------------------------------------------------------------------------------------------------------------------------------------------------------------------------------------------------------------------------------------------------------------------------------------------------------------------|
|                                   |                                                                                                                                                                 |                                     | and analgesic and safety outcomes, particularly block-related and respiratory complications.                                                                                                                                                                                                                                                                    | however, suprascapular block has fewer side effects. These findings suggest that suprascapular block may be considered an effective and safe interscalene block alternative for shoulder surgery.                                                                                                                                                                |
| <b>M.S. Abrahams et al., 2009</b> | Ultrasound guidance compared with electrical neurostimulation for peripheral nerve block: a systematic review and meta-analysis of randomized controlled trials | Systematic review and meta-analysis | The block success rate as the percentage of blocks which allowed patients to undergo a surgical procedure without supplementation or conversion to general anesthesia (GA) or spinal anesthesia (SA). Other outcomes: time to perform the block, onset time, duration of block and complications such as vascular puncture or persistent neurological symptoms. | US improves efficacy of peripheral nerve block compared with techniques that utilize PNS for nerve localization.                                                                                                                                                                                                                                                 |
| <b>G. Pascarella et al., 2021</b> | Triple Monitoring May Avoid Intraneural Injection during Interscalene Brachial Plexus Block for Arthroscopic Shoulder Surgery: A Prospective Preliminary Study  | A Prospective Preliminary Study     | The aim: verify the clinical applicability, efficacy and sensitivity given by the triple monitoring (TM) method, a combination of US, NS and OIP, during the execution of the IBPB with a lateral approach for shoulder arthroscopy surgery and its ability to prevent an unsafe intraneural injection.                                                         | Triple monitoring is a feasible technique that effectively identifies needle-to-nerve contact, which may potentially have implications for reducing nerve injury during IBPB for arthroscopic shoulder surgery. Ultrasound, NS, and OIP are synergistic, allowing for the optimal needle tip placement and preventing intraneural injection of local anesthetic. |
| <b>S. Dhir et al., 2016</b>       | A Comparison of Combined Suprascapular and Axillary Nerve Blocks to                                                                                             | Equivalence study                   | The aim: to prospectively assess and compare the analgesic effectiveness of SSAX with ISB for                                                                                                                                                                                                                                                                   | Combined suprascapular and axillary nerve block provides non-equivalent                                                                                                                                                                                                                                                                                          |

|                       |                                                                                                                                           |                                                                   |                                                                                                                                                                                                                                                                                                                                                                                 |
|-----------------------|-------------------------------------------------------------------------------------------------------------------------------------------|-------------------------------------------------------------------|---------------------------------------------------------------------------------------------------------------------------------------------------------------------------------------------------------------------------------------------------------------------------------------------------------------------------------------------------------------------------------|
|                       | Interscalene Nerve Block for Analgesia in Arthroscopic Shoulder Surgery                                                                   | arthroscopic shoulder surgery in a randomized controlled fashion. | analgesia compared with ISB after arthroscopic shoulder surgery. While SSAX provides better quality pain relief at rest and fewer adverse effects at 24 hours, ISB provides better analgesia in the immediate postoperative period. For arthroscopic shoulder surgery, SSAX can be a clinically acceptable analgesic option with different analgesic profile compared with ISB. |
| A. Tognù et al., 2021 | One needle insertion and one injection for a simple, safe and successful ultrasound-guided approach to interscalene brachial plexus block | Letter to the editor                                              | /                                                                                                                                                                                                                                                                                                                                                                               |
|                       |                                                                                                                                           |                                                                   | The C6 nerve root is easy to identify by the US scout-scan of Chassaignac tubercle that represents a reproducible US landmark, increasing ISB safety and leading to one needle insertion and one injection without needle re-positioning.                                                                                                                                       |
